# Supplementary material for: International recommendations for a vascular access minimum dataset: a Delphi consensus-building study
Source: PubMed Central journal article supplement — BMJ Qual Saf. 2020 Sep 22;30(9):722–30. doi: 10.1136/bmjqs-2020-011274 (PMC8380895; doi:10.1136/bmjqs-2020-011274), 2020-09-22
Supplement: bmjqs-2020-011274supp002.pdf [file bmjqs-2020-011274supp002.pdf]

**Supplementary material 1: Round 3 consensus panel composition**

| <b>Panellist</b>                                                                                                                                                        | <b>Origin</b>        | <b>Specialty</b>                                           |
|-------------------------------------------------------------------------------------------------------------------------------------------------------------------------|----------------------|------------------------------------------------------------|
| Prof Sergio Bertoglio                                                                                                                                                   | Italy                | MD, Surgical Oncology                                      |
| Mr Ton van Boxtel                                                                                                                                                       | Netherlands          | RN, Vascular access specialist                             |
| A/Prof Vineet Chopra                                                                                                                                                    | USA                  | MD, General Hospitalist                                    |
| Ms Michelle DeVries                                                                                                                                                     | USA                  | Infection Preventionist                                    |
| Prof Ilker Devrim                                                                                                                                                       | Turkey               | MD, Paediatric Infectious Disease                          |
| Ms Gail Egan                                                                                                                                                            | USA                  | NP, Interventional Radiology                               |
| Ms Carole Hallam                                                                                                                                                        | England              | RN, Independent Nurse Consultant<br>(Infection Prevention) |
| Dr Fredrik Hammarskjold                                                                                                                                                 | Sweden               | MD, Anaesthesia and Intensive Care                         |
| Ms Jocelyn Hill                                                                                                                                                         | Canada               | RN, Vascular access specialist                             |
| Ms Tricia Kleidon                                                                                                                                                       | Australia            | NP, Paediatric Vascular Access                             |
| Prof Maria Magalhaes                                                                                                                                                    | Brazil               | MD, Neonatology, Quality and Safety                        |
| Prof Olivier Mimoz                                                                                                                                                      | France               | MD, Emergency medicine                                     |
| Ms Suzanne Oakley                                                                                                                                                       | United Arab Emirates | RN, Oncology                                               |
| A/Prof Mavilde Pedreira                                                                                                                                                 | Brazil               | RN, Paediatric ICU                                         |
| <b>Non-voting panellists</b>                                                                                                                                            |                      |                                                            |
| Prof Claire Rickard                                                                                                                                                     | Australia            | RN, ICU                                                    |
| Ms Jessica Schults                                                                                                                                                      | Australia            | RN, Paediatric ICU                                         |
| Prof: Professor; A/Prof: Associate Professor; MD: Medical doctor; RN: Registered nurse; NP: Nurse practitioner; USA: United States of America; ICU: Intensive Care Unit |                      |                                                            |
