# Supplementary material for: International recommendations for a vascular access minimum dataset: a Delphi consensus-building study
Source: PubMed Central journal article supplement — BMJ Qual Saf. 2020 Sep 22;30(9):722–30. doi: 10.1136/bmjqs-2020-011274 (PMC8380895; doi:10.1136/bmjqs-2020-011274), 2020-09-22
Supplement: bmjqs-2020-011274supp003.pdf [file bmjqs-2020-011274supp003.pdf]

**Supplementary material 2. 'Top 10' priority items**

| <b>Rank</b> | <b>Variable Description</b>                                                                                         | <b>Checked, n (%)<br/>(n = 64)</b> |
|-------------|---------------------------------------------------------------------------------------------------------------------|------------------------------------|
| 1           | Insertion date and time (insertion item)                                                                            | 52 (81%)                           |
| 2           | Site of insertion (insertion item)                                                                                  | 50 (78%)                           |
| 3           | Complication identified during dwell (e.g. extravasation, occlusion, dislodgement) (complications and removal item) | 47 (73%)                           |
| 4           | Indication for device (insertion item)                                                                              | 45 (70%)                           |
| 5           | Reason for removal (complications and removal item)                                                                 | 44 (69%)                           |
| 6           | Date and time of removal (complications and removal item)                                                           | 39 (61%)                           |
| 7           | Number of insertion attempts (insertion item)                                                                       | 38 (59%)                           |
| 8           | Catheter tip position (insertion item)                                                                              | 36 (56%)                           |
| 9           | Adverse event (insertion item)                                                                                      | 32 (50.0%)                         |
| 10          | Dressing and securement used on insertion (insertion item)                                                          | 29 (45.3%)                         |
